# Supplementary material for: Identification of two different chemosensory pathways in representatives of the genus Halomonas
Source: PubMed Central journal article supplement (PMC5907407; doi:10.1186/s12864-018-4655-4), 2018-04-18
Supplement: 12864_2018_4655_MOESM4_ESM.pdf [file 12864_2018_4655_MOESM4_ESM.pdf]

```

CheR2 Ht -----MSAFAPFKALVHQRCGLHLDGLAEARLFRAVAS 33
CheR3 Pa -----MQANGVWSLQ-----PLADMSAAEFRDWQVLLNRTGVVLEQRRTFLQASLTA 49
WspC Pa -----MNDRFERLLKSRIGLDASSVGSVIERAVRQ 31
CheR1 Pa -----MSAANADFELEFRVFLKTCGIVLGSNKQYLVSRLNK 37
CheR2 Pa ---MPTSTP-----SPVFGNQEYHYTREDFQQVVERLYRLTGISLAESKAQLVYSRLSR 51
CheR1 Ht MTEQRRERVVDAGQWTSSSQIERDLVLTADFTRIRELIYQRAGIVLAEHKREMVYSRLAK 60
CheR Ec ----MTSSLPCGQTSLLLQMTERLALSDAHFRRIISQLIYQRAGIVLADHKRDMVYNRLVR 56
CheR St ----MTSSLP SGQTSVLLQMTORLALSDAHFRRICQLIYQRAGIVLADHKRDMVYNRLVR 56
      :   *   :   :

```

  

```

CheR2 Ht LQASTGLTDITQLLKLSCDT---ALFDQFVSQLTVNETYFFREPDALDWLVTNYLPQRL 90
CheR3 Pa RMRELIGIGDYHSYRQVTDGPRGAVEWATLLDRLTVQETRRFRHPPSFELLERYLGERLR 109
WspC Pa RMSSGLALHDEDEYWMRLNGSP---GEVQALIEAVVVPETWFFRYPSFTTLARLAFERLP 88
CheR1 Pa LMEQQGIKSLGELVQRIQTQ-RG-GLREMVVDAMTTNETLWFRDTYFPEVLKQRVLPELI 95
CheR2 Pa RLRLRLRSGFAEYFTHLDREP---GEQQLFVNALTTNLTAFFREHHFPLLADLARRQLQ 108
CheR1 Ht RLRRHHGMTRFTDYLVRLEQPEA-KWEAFTNALTTNLTAFFREAHFPLLAEHIKN--- 116
CheR Ec RLRLSLGLTDFGHYLNLESNQHS-GEWQAFINSLTTNLTAFFREAHFPLLADHARR--- 112
CheR St RLRLALGLDDFGRYLSMLEANQNS-AEWQAFINALTTNLTAFFREAHFPILAEHARR--- 112
      :           :           . . . . * : **      :   *

```

  

```

CheR2 Ht -TTEQPPLSIFSAGCSSGEEPYSVAMMLFER---FGERAKALFTLTGGDLDHQVLAKARQ 146
CheR3 Pa REGMPRPWALWSVGCSSGEEPYSLAMCAAQVLR--GQEREDFFGVGTGDISLHALQARQ 167
WspC Pa SLGGGRALRILSLPCSTGEEPYSIVMALLD-----AGLSEYLFVDALDVSARVIERASL 143
CheR1 Pa KANGGQRLRIWSAACSSGQEPYLSMAIDEFEKTNLGQLKAGQIVATDLSGSMILTAAKA 155
CheR2 Pa ---RHRPLRIWSAAASTGEEPYSIAITLVE---ALGSFDPPVKIVASDIDTGVLD CARQ 161
CheR1 Ht ---KQDPVTIWCSAAASTGEEPYSIAMTLE---TLGAKASQAKVIATDIDTDALARARA 169
CheR Ec ---RSGEYRVWSAAASTGEEPYSIAMTLAD---TLGTAPGRWKVAFASDIDTEVLEKARS 165
CheR St ---RHGEYRVWSAAASTGEEPYSIAITLAD---ALGMAPGRWKVAFASDIDTEVLEKARS 165
      : . . * : : * : : : : : . * : : *

```

  

```

CheR2 Ht AVYGGMA-FRALSPAFFKRYFS---PHKGRYKLHEPLRQWVTFRPFNLLNANEDSPVGP 201
CheR3 Pa ANYPARK-LEQLEAGLVERYCERQ---ADGSFSVKILTERRVCCARLNVLDLAK-APWSG 222
WspC Pa GVIYGRNS-FRGDELGFRDRHFS---EVAEGYQLAEQVRRKVRFCGNLLDPGLLAGLAGEAP 198
CheR1 Pa GEYDTLAMGRGLSPERLQRYFDAQ---GPGRWAVKPAIRSRVEFRALNLLD-SY-ASLGK 210
CheR2 Pa GVIYPLER-LEQMPAPLKKRFFLRGTGPNAGKAVVEELRQLVEFRQINLLEADW-SIAGE 219
CheR1 Ht GVIYPLEQ-VRKIDEARVKRFFQKGTGNHAGFALIRPEVSALVEFLPPLNLLAPQW-PIKGP 227
CheR Ec GIYRHEE-LKNLTPQQLQRYFMRGTGPHEGLVVRQELANYVDFAPLNLLAKQY-TVPGP 223
CheR St GIYRLSE-LKTLSPQQLQRYFMRGTGPHEGLVVRQELANYVEFSSVNLLKQY-NVPGP 223
      . * . . * : : : : * : * : * :

```

  

```

CheR2 Ht FDVILFRNVSIFYDQQTTRRHIIHQQLSOLLAPNGILLCGVTEITLGNLGVFELTEAQGVFY 261
CheR3 Pa MDVIFCQNLLIYFRRWRREILNRLAERLAPGGLLVIGVGEVVDWVSHPELEPVADERVLA 282
WspC Pa YDFVFCRNLLIYFDRPTQSEVVEVLKRLRLSDGAMFIGPAEASLLSQHGMQPIGVPLSFV 258
CheR1 Pa FDMVFCRNVIYFSAEVKRDILLRHGTLKPGGYLFLGASEALNNLFDHYQMVCSPGII 270
CheR2 Pa LDAIFCRNVIYFDKPTQTRLLERMVALLRPEGLFFAGHSENFVHASHLVRVSVGGQTVYSP 279
CheR1 Ht FDAVFCRNIMIYFDKDTQSKILKRFPAPLMKPDGLLAFAGHSENFYSISDAFKLRGQTVYNL 287
CheR Ec FDAIFCRNVIYFDQTQQEILRRFVPLLPKPDGLLAFAGHSENFVSHLERRFTLRGQTVYAL 283
CheR St FDAIFCRNVIYFDKTTQEDILRRFVPLLPKPDGLLAFAGHSENFVSNLVRFSLRGQTVYAL 283
      * : : * : * : : : : * : . * *

```

  

```

CheR2 Ht FRHAEQPAIVPETPLQPSLLAMDNMAEDSITEDSLVAESANKQLALDNCTDVAPQAPRQ 321
CheR3 Pa FTRKGYSGT----- 291
WspC Pa FRRITSEAPRGA---RPKAV-----SDGARPVVAAAVERASIR-PSPPPPAKPRQ 303
CheR1 Pa YRAK----- 274
CheR2 Pa A----- 280
CheR1 Ht AKK----- 290
CheR Ec SKD----- 286
CheR St SKDKA----- 288

```

  

```

CheR2 Ht HATEKEPTD-----SISHQLHTAHLRLNQNAFDDAATLLEALLEQQPWSIDALVLAGLV 375
CheR3 Pa ----- 291
WspC Pa RLSSLVPPASGQPLASPVGGEFDEIARLADAGQHREARAACERQLAARGPSATVFYWLGLL 363
CheR1 Pa ----- 274
CheR2 Pa ----- 280
CheR1 Ht ----- 290
CheR Ec ----- 286
CheR St ----- 288

```

|                        |                                                            |     |
|------------------------|------------------------------------------------------------|-----|
| <b>CheR2</b> <i>Ht</i> | ARWQORPQLAYEHFKRAIYVAPECWPAHFYLAELYR-QGELAD-KPLQKQRYAAVVRL | 433 |
| CheR3 <i>Pa</i>        | -----                                                      | 291 |
| WspC <i>Pa</i>         | SDVAGQEQAQDFYRKALYLEPQHAEALAHLAALLAARGDHAGARRLQQR--A-----  | 414 |
| CheR1 <i>Pa</i>        | -----                                                      | 274 |
| CheR2 <i>Pa</i>        | -----                                                      | 280 |
| <b>CheR1</b> <i>Ht</i> | -----                                                      | 290 |
| CheR <i>Ec</i>         | -----                                                      | 286 |
| CheR <i>St</i>         | -----                                                      | 288 |

|                        |                                                 |     |
|------------------------|-------------------------------------------------|-----|
| <b>CheR2</b> <i>Ht</i> | TTAPTSDGGLDTITPPLPPGDARFLAERYLDAVNLTLASTSTTQGVG | 480 |
| CheR3 <i>Pa</i>        | -----                                           | 291 |
| WspC <i>Pa</i>         | ARGVNKDG-----                                   | 422 |
| CheR1 <i>Pa</i>        | -----                                           | 274 |
| CheR2 <i>Pa</i>        | -----                                           | 280 |
| <b>CheR1</b> <i>Ht</i> | -----                                           | 290 |
| CheR <i>Ec</i>         | -----                                           | 286 |
| CheR <i>St</i>         | -----                                           | 288 |
