# Supplementary material for: Identification of two different chemosensory pathways in representatives of the genus Halomonas
Source: PubMed Central journal article supplement (PMC5907407; doi:10.1186/s12864-018-4655-4), 2018-04-18
Supplement: 12864_2018_4655_MOESM5_ESM.pdf [file 12864_2018_4655_MOESM5_ESM.pdf]

CLUSTAL O(1.2.4) multiple sequence alignment

|                |                                                                                                                                             |     |
|----------------|---------------------------------------------------------------------------------------------------------------------------------------------|-----|
| DGC <i>Ht</i>  | MSKPAPSLHDKLNQLRERFIEQLPSRLAQTAEWQQSRTTSEEQARLAPELHRFFHSLKG                                                                                 | 60  |
| WspR <i>Pa</i> | -----                                                                                                                                       | 0   |
| PleD <i>Cc</i> | -----                                                                                                                                       | 0   |
| DGC <i>Ht</i>  | TGRSLGFERLAQLADQAQEALTTSPARADIDTFISQLLLMGHEQQHLRSHQGOQALAA                                                                                  | 120 |
| WspR <i>Pa</i> | -----MHNPHESKTDLG-----                                                                                                                      | 12  |
| PleD <i>Cc</i> | -----                                                                                                                                       | 0   |
| DGC <i>Ht</i>  | VNSFELSSQVEPLRNKRQRLIYLCDDEPEQVDQLIHHLR-CFGHEVVQFIDTDTFFNAVL                                                                                | 179 |
| WspR <i>Pa</i> | -----APLD--GAVMVLVDDQAMIGEAVRRSLASEAGIDFHFCSDPQQAVAVAN                                                                                      | 60  |
| PleD <i>Cc</i> | -----MSARILVDDIEANVRLLEAKLT-AEYVEVSTAMDGPTALAMAA                                                                                            | 43  |
|                | :  :  **                  :  *                  :  .  *                  .  .                                                               |     |
| DGC <i>Ht</i>  | TRRPDAVIMDVFQFPQQTAGTETLTSLNKLTG---QPLPAIVLSAHSDFHSRLSAVRAG                                                                                 | 235 |
| WspR <i>Pa</i> | QIKPTVILQDLVMP----GVDGLTLLAAYRGNPATRDIP IIVLSTKEEPTVKSAAFAAG                                                                                | 115 |
| PleD <i>Cc</i> | RDLPDI ILLVMMP----GMDGFTVCRKLDKDDPTTRHIPVVLITALDGRGDRIQGLESG                                                                                | 98  |
|                | *  :  :  *  :  *                  *  :  *                  .                  :  *  :  :  :  :  .                  :  .  .  *  :            |     |
| DGC <i>Ht</i>  | CGGYFTKPKVPLDLMLAVDEL TAPAAE-----E-----PLKVLV                                                                                               | 269 |
| WspR <i>Pa</i> | ANDYLKLPDAIELVARIRYHSRSYIALQQ---RDE-----                                                                                                    | 148 |
| PleD <i>Cc</i> | ASDFLTKPIDDVMLFARVRSLTRFKLVIDELRQREA SGRRMGVIAGAAARLDGLGGRVLI                                                                               | 158 |
|                | .  .  .  .  *  .  :  *  .  :  :                                                                                                             |     |
| DGC <i>Ht</i>  | VDDEPEAAAYHALLLEESGMLTHQVHH-PADALTVMERFSPDLLLV D VYMPVCSGEELAS                                                                              | 328 |
| WspR <i>Pa</i> | -----AYRALR---                                                                                                                              | 154 |
| PleD <i>Cc</i> | VDDNERQAQRVA---AELGVEHRPVI ESDPEKAKISAGGPVDLVIV N AAAAKNF DGLRFTA                                                                           | 215 |
|                | .  .                                                                                                                                        |     |
| DGC <i>Ht</i>  | IIRQQPEHLGLPIIYLSSETDSQKQISAMSAGVEAFLTKPVQPEELVSAVQLRAE-----                                                                                | 383 |
| WspR <i>Pa</i> | -----ESQQ                                                                                                                                   | 158 |
| PleD <i>Cc</i> | ALRSEERTQLPVLAMVDPDDRGRMVKALEIGVNDILSRPIDPQELSARVKTQIQRKRYT                                                                                 | 275 |
| DGC <i>Ht</i>  | -----RLRLLRSLMTRDSMTGLYNHSTTTELINKNLAQAHRDNSQHAMAMIDIDHFKHVN                                                                                | 438 |
| WspR <i>Pa</i> | QLLETNL-VLQRLMNSDGLTGLSNRRHFDEYLEMEWRRSLREQSLSLLMIDVDYFKSYN                                                                                 | 217 |
| PleD <i>Cc</i> | DYLRNNLDHSLELAVTDQLTGLHNRRYMTGQLDSLVKRATLGGDPVSALLIDIDFFKKIN                                                                                | 335 |
|                | .  *                  *                  *  :  ***  *                  :  :                  :  :                  .  :  :  ***  *  *  *  * |     |
| DGC <i>Ht</i>  | DTHGHLAGDQVIITLARLLKS-RLRLSDIIGRYGGEFFVLLKGINAEKAATLIDSLRED                                                                                 | 497 |
| WspR <i>Pa</i> | DTFGHVAGDEALRQVAGAIREGCSRSSDLAARYGGEFFAMVLPGTSPGGARLLAEKVRRT                                                                                | 277 |
| PleD <i>Cc</i> | DTFGHDIGDEVLREFALRLAS-NVRAIDLPCRYGGEFFVIMPDTALADALRIAERIRMH                                                                                 | 394 |
|                | **  **  **  :  :  .  *  :  .  *  *  :  *****  :  :  .  *  :  :  *  :                                                                        |     |
| DGC <i>Ht</i>  | FALIDFHT--GEVFRCTFSAGISSFPAQ---PSTEPLRLSADQALYRAKHQGRNQVVIS                                                                                 | 552 |
| WspR <i>Pa</i> | VESLQISHDQPRPGSHLTVSIGVSTLVPGGGQTFRVLIEADQALYQAKNNGRNQVGLM                                                                                  | 337 |
| PleD <i>Cc</i> | VSGSPFTVAHGRENLTISIGVS--ATAGEGDTPEALLKRADEGVYQAKASGRNAVVGK                                                                                  | 452 |
|                | .  :                  .  *  *  *  *                  :  .  *  **  :  :  *  *  *  *  *                                                       |     |
| DGC <i>Ht</i>  | PELADDR---                                                                                                                                  | 559 |
| WspR <i>Pa</i> | EQPVPPAPAG                                                                                                                                  | 347 |
| PleD <i>Cc</i> | AA-----                                                                                                                                     | 454 |

Percent Identity Matrix - created by Clustal2.1

|                |        |        |        |
|----------------|--------|--------|--------|
| DGC <i>Ht</i>  | 100.00 | 28.30  | 27.94  |
| WspR <i>Pa</i> | 28.30  | 100.00 | 34.17  |
| PleD <i>Cc</i> | 27.94  | 34.17  | 100.00 |
