# Supplementary material for: Identification of two different chemosensory pathways in representatives of the genus Halomonas
Source: BMC Genomics. 2018 Apr 18;19:266. doi: 10.1186/s12864-018-4655-4 (PMC5907407; doi:10.1186/s12864-018-4655-4)
Supplement: Supplementary file 7 — Table S3. Protein percent identity matrices between the 16 microorganisms where clusters identical to cluster 2 were found. A) Percent identity matrix for diguanylate cyclase proteins from cluster 2-like sequences; B) Percent identity matrix for CheA proteins from cluster 2-like sequences; C) Percent identity matrix for CheR proteins from cluster 2-like. In blue: γ- Oceanospirillales, in red: α-Rhodospirillales, in green: γ- Chromatiales, in brown: γ- Enterobacterales. (PDF 61 kb) [file 12864_2018_4655_MOESM7_ESM.pdf]

### A) DGCs

Percent Identity Matrix - created by Clustal2.1

[illegible]

### B) CheAs

Percent Identity Matrix - created by Clustal2.1

[illegible]

### C) CheRs

Percent Identity Matrix - created by Clustal2.1

[illegible]
